# Supplementary material
Source: publisher figshare collection journal article supplement (https://frontiersin.figshare.com/ndownloader/files/22332999)

### Appendix 3

Inter-individual variation in the percentage of time occupying 'encamped' and 'exploratory' states. Y-axis includes names of satellite-collared elephants.

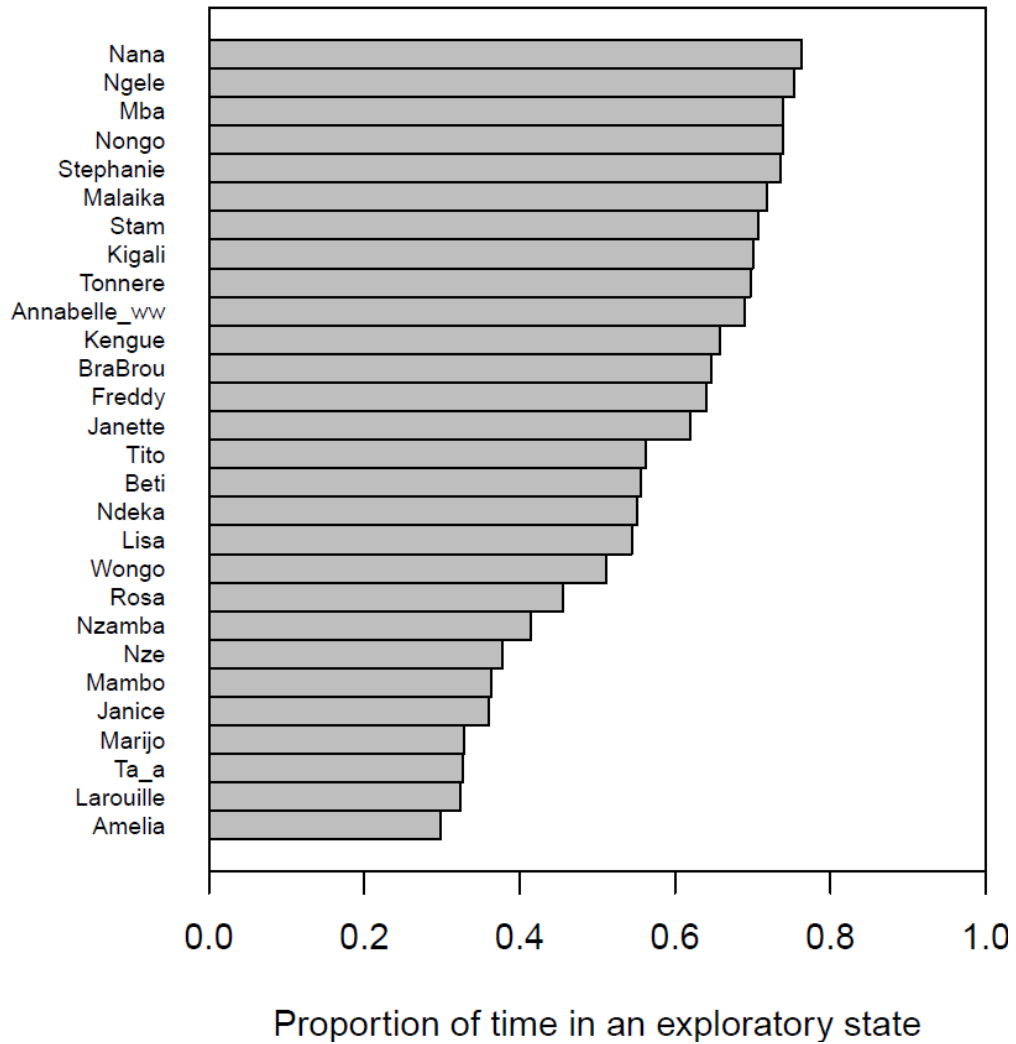

Supplement: Supplementary file 1 [file 22332999]
